# Supplementary material
Source: publisher figshare collection journal article supplement (https://acs.figshare.com/ndownloader/files/3757327)
Supplement: Supplementary file 1 [file 3757327]

# Supporting Information to

## Fast Characterization of Polyplexes by Taylor Dispersion Analysis

Laurent Leclercq<sup>1</sup>, Sören Reinhard<sup>2</sup>, Joseph Chamieh<sup>1</sup>, Markus Döblinger<sup>3</sup>, Ernst Wagner<sup>2</sup>  
and Hervé Cottet<sup>1\*</sup>

<sup>1</sup>Institut des Biomolécules Max Mousseron (IBMM, UMR 5247 CNRS, Université de Montpellier, Ecole Nationale Supérieure de Chimie de Montpellier), Place Eugène Bataillon, CC 1706, 34095 Montpellier Cedex 5, France.

<sup>2</sup>Pharmaceutical Biotechnology, Department of Pharmacy, and Center for NanoScience, Ludwig-Maximilians-Universität, Butenandtstrasse 5-13, D-81377 Munich, Germany.

<sup>3</sup>Department of Chemistry, Ludwig-Maximilians-Universität, Butenandtstrasse 5-13, D-81377 Munich, Germany.

### Content

This Supporting information includes:

-Figure SI-1: Taylorgrams obtained for the PLKC50/DNA polyplex sample (N/P=12) in frontal mode (A) and its first derivative (B).

-Figure SI-2: Taylorgrams obtained for the PLKC100/DNA polyplex sample (N/P=12) in frontal mode (A) and its first derivative (B).

-Figure SI-3: Taylorgrams obtained for the DGL-G2/DNA polyplex sample (N/P=12) in frontal mode (A) and its first derivative (B).

-Figure SI-4: Figure S4. Taylorgrams obtained for the DGL-G3/DNA polyplex sample (N/P=12) in frontal mode (A) and its first derivative (B).

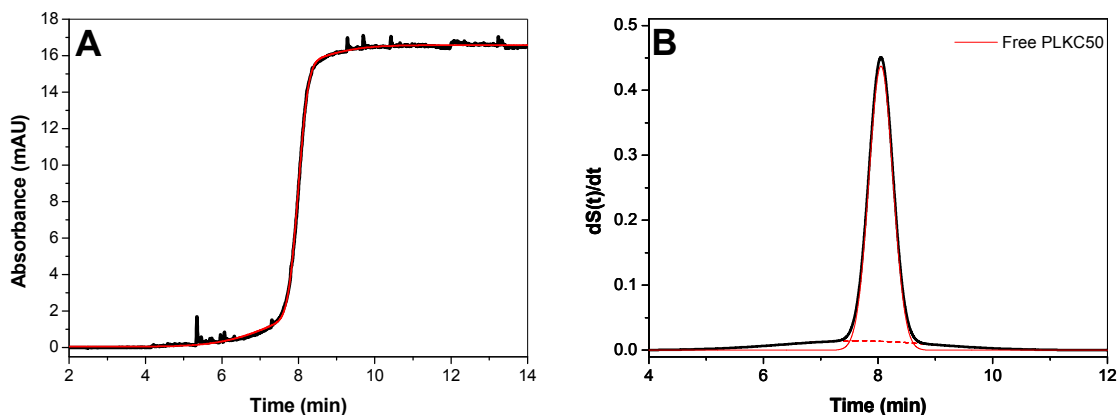

**Figure SI-1. Taylorgrams obtained for the PLKC50/DNA polyplex sample ( $N/P=12$ ) in frontal mode (A) and its first derivative (B).** Experimental conditions as in Figure 2. After mixture, the final PLL concentration is 0.6 g/L and DNA concentration is 0.1 g/L in the eluent, respectively.

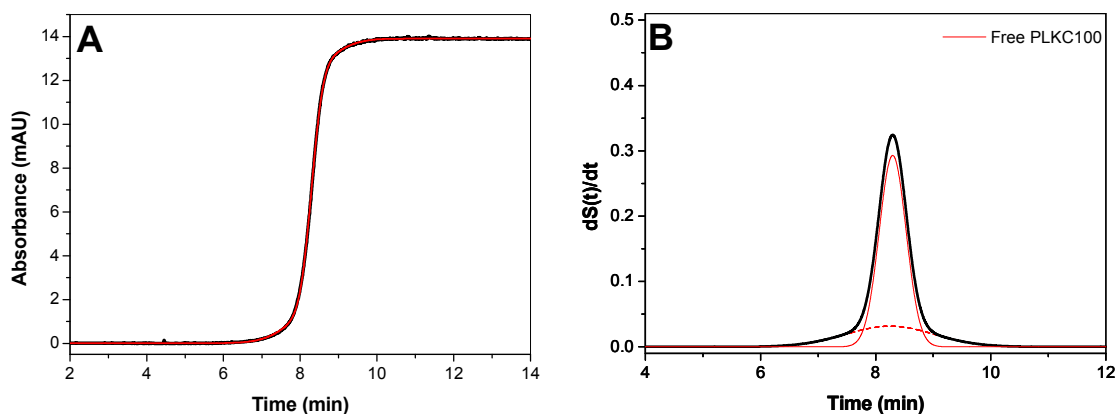

**Figure SI-2. Taylorgrams obtained for the PLKC100/DNA polyplex sample ( $N/P=12$ ) in frontal mode (A) and its first derivative (B).** Experimental conditions as in Figure 2. After mixture, the final PLL concentration is 0.6 g/L and DNA concentration is 0.1 g/L in the eluent, respectively.

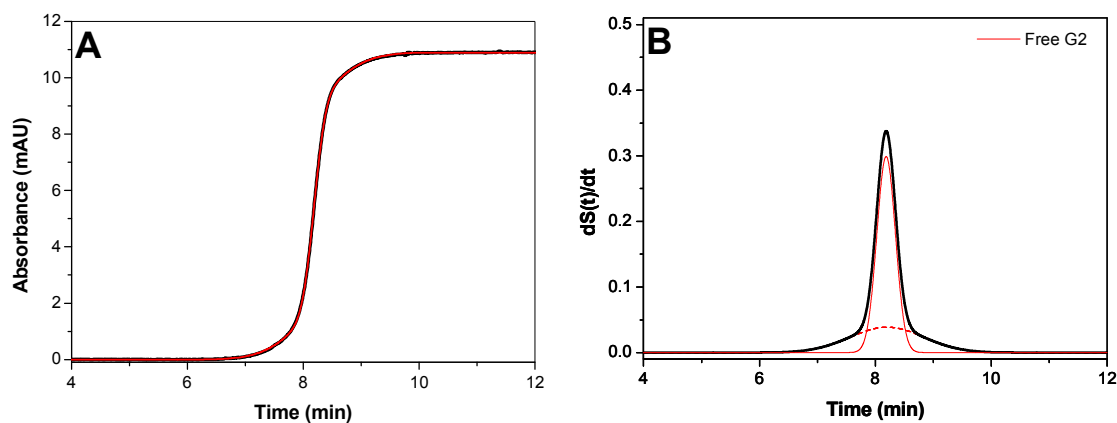

**Figure SI-3. Taylorgrams obtained for the DGL-G2/DNA polyplex sample ( $N/P=12$ ) in frontal mode (A) and its first derivative (B).** Experimental conditions as in Figure 2. After mixture, the final PLL concentration is 0.8 g/L and DNA concentration is 0.1 g/L in the eluent, respectively.

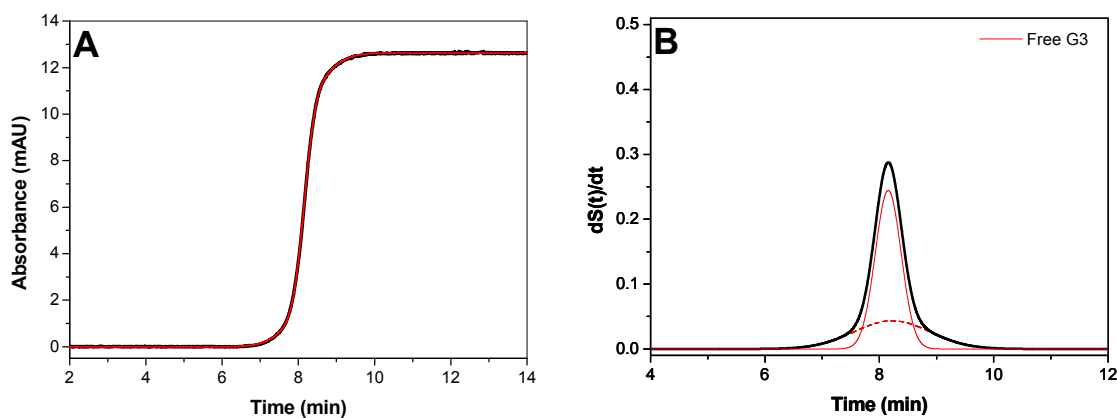

**Figure SI-4. Taylorgrams obtained for the DGL-G3/DNA polyplex sample ( $N/P=12$ ) in frontal mode (A) and its first derivative (B).** Experimental conditions as in Figure 2. After mixture, the final PLL concentration is 0.8 g/L and DNA concentration is 0.1 g/L in the eluent, respectively.
